# Supplementary material
Source: Springer Nature journal article supplement (https://www.springermedizin.de/resource/supplementary/12865_2008_214_MOESM1_ESM.pdf/9428754)

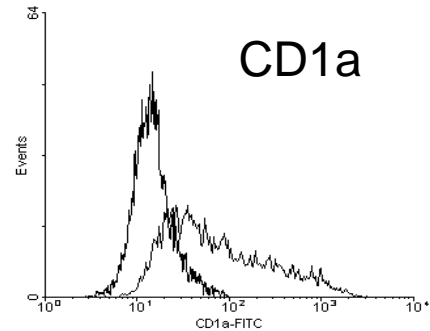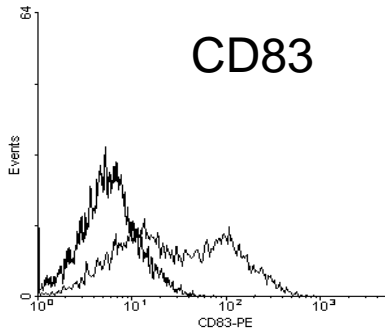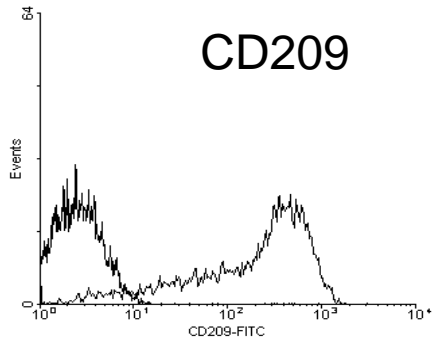

Supplement: MOESM1 [file 9428754]
